# Supplementary material for: Studies of the Efficacy of Low-Dose Apatinib Monotherapy as Third-Line Treatment in Patients with Metastatic Colorectal Cancer and Apatinib’s Novel Anticancer Effect by Inhibiting Tumor-Derived Exosome Secretion
Source: MDPI journal article supplement (doi:10.3390/cancers14102492), 2022-05-19
Supplement: s1 [file s1]

**Table S1.** Sequences of primers for real-time PCR.

| <b>Gene</b>      | <b>Primers-Forward</b>              | <b>Primers-Reverse</b>            |
|------------------|-------------------------------------|-----------------------------------|
| <i>GAPDH</i>     | 5'-TGCACCACCAACTGCTTAGC -3'         | 5'-GGCATGGACTGTGGTCATGAG -3'      |
| <i>AP3S2</i>     | 5'-GATTGAGGCTCAAAACAGGCTG<br>G-3'   | 5'-CAAACCTGGGACAGGTTGGGAAC -3'    |
| <i>YPEL4</i>     | 5'-CACGATGAGCTTATTTCCAAGTC<br>C -3' | 5'-CCAGTGTGGTTTTGCAGCTCTC -3'     |
| <i>SULT1A3</i>   | 5'-ACGGCTCATCAAGTCACACCTG -3'       | 5'-TGCGCCTTTTCCATACGGTGGA -3'     |
| <i>TCEAL7</i>    | 5'-TGAACGCCAGCAAACAGAAGGG -3'       | 5'-CACCTTTCCATCTCATCTCCCTC -3'    |
| <i>TRIM59</i>    | 5'-GAAGGAAATACGAGAGCAGCAG<br>C -3'  | 5'-GGTTGAACCTCAGGAAGTGGTC -3'     |
| <i>CCR4</i>      | 5'-CTCTGGCTTTTGTTCAGTCTGC -3'       | 5'-AGCCACAGTATTGGCAGAGCA -3'      |
| <i>EEA1</i>      | 5'- CTTCTAGCCACCAGGCAAGATC<br>-3'   | 5'-CCAATGTAGCCTTGGCAGTCTTC<br>-3' |
| <i>LAMP2</i>     | 5'-GGCAATGATACTTGTCTGCTGC<br>-3'    | 5'-GTAGAGCAGTGTGAGAACGGA-3'       |
| <i>Rab11a</i>    | 5'-AGCACCATTGGAGTAGAGTTTG<br>C-3'   | 5' AAGGCACCTACAGCTCCACGAT-3'      |
| <i>Rab11b</i>    | 5'-TGTCGGTGCCTCACTGGATTGA-3'        | 5'-TGTCATAGTGCTCAGCCAGGCT-3'      |
| <i>Rab11c</i>    | 5'-ACTGCTCTTCCTGGAGACCTCA-3'        | 5'-GCTGTTCTGTCTCTGCTTGGAC-3'      |
| <i>Rab27a</i>    | 5'-GAAGCCATAGCACTCGCAGAGA<br>-3'    | 5'-CAGGACTTGTCCACACACCGTT-3'      |
| <i>Rab27b</i>    | 5'-TGGCAACAAGGCAGACCTACCA<br>-3'    | 5'-CTCCACATTCTGTCCAGTTGCTG-3'     |
| <i>Snap23</i>    | 5'-GGTGACAAATGGTCAGCTTCAG<br>C-3'   | 5'-CCAGGATACTGCCCAGTTGAGT-3'      |
| <i>Syntaxin4</i> | 5'-CGGCAGACTATTGTCAAACCTGG<br>G-3'  | 5'-ATCTCATCGCGCAGGTTCTGCA-3'      |
| <i>VAMP2</i>     | 5'CTCCAAACCTCACCAGTAACAGG<br>-3'    | 5'-AGCTCCGACAGCTTVTGGTCTC-3'      |

**Fig.4F**

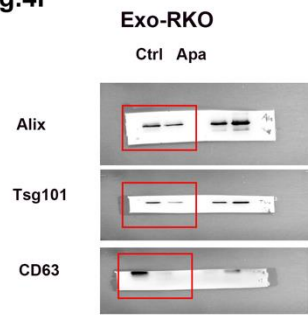

**Exo-HCT116**

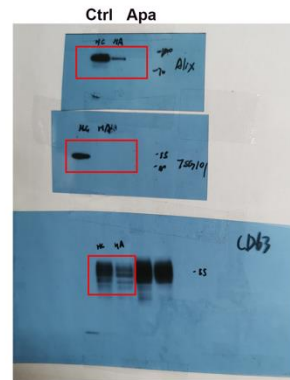

**Fig.6A**

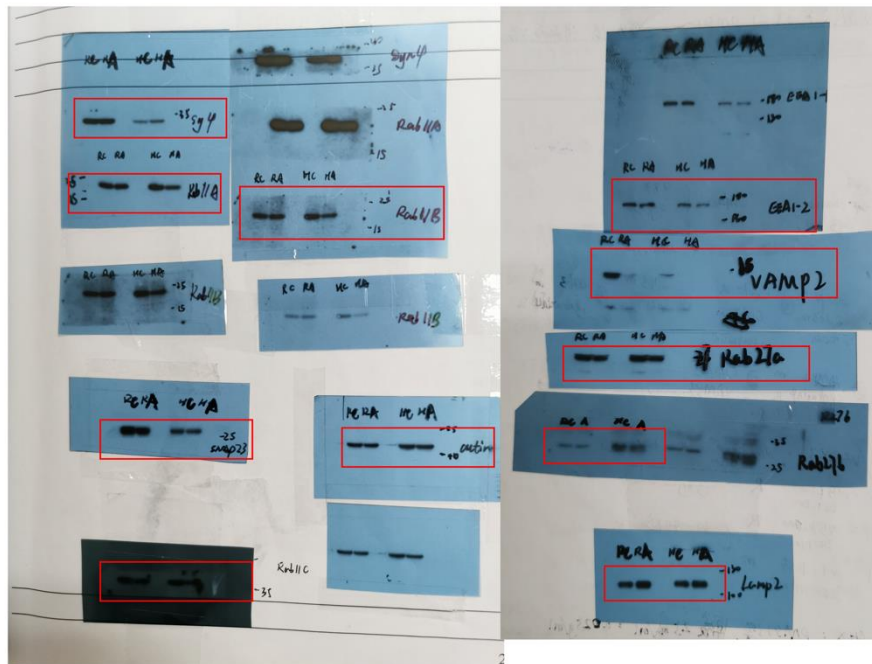

**Figure S1.** Original blots of western blot analyses in this paper (Fig.4F (machine reading blots) and Fig.6A (original films)).
